# Supplementary material
Source: Springer Nature journal article supplement (https://www.springermedizin.de/resource/supplementary/12913_2012_2122_MOESM2_ESM.pdf/9529662)

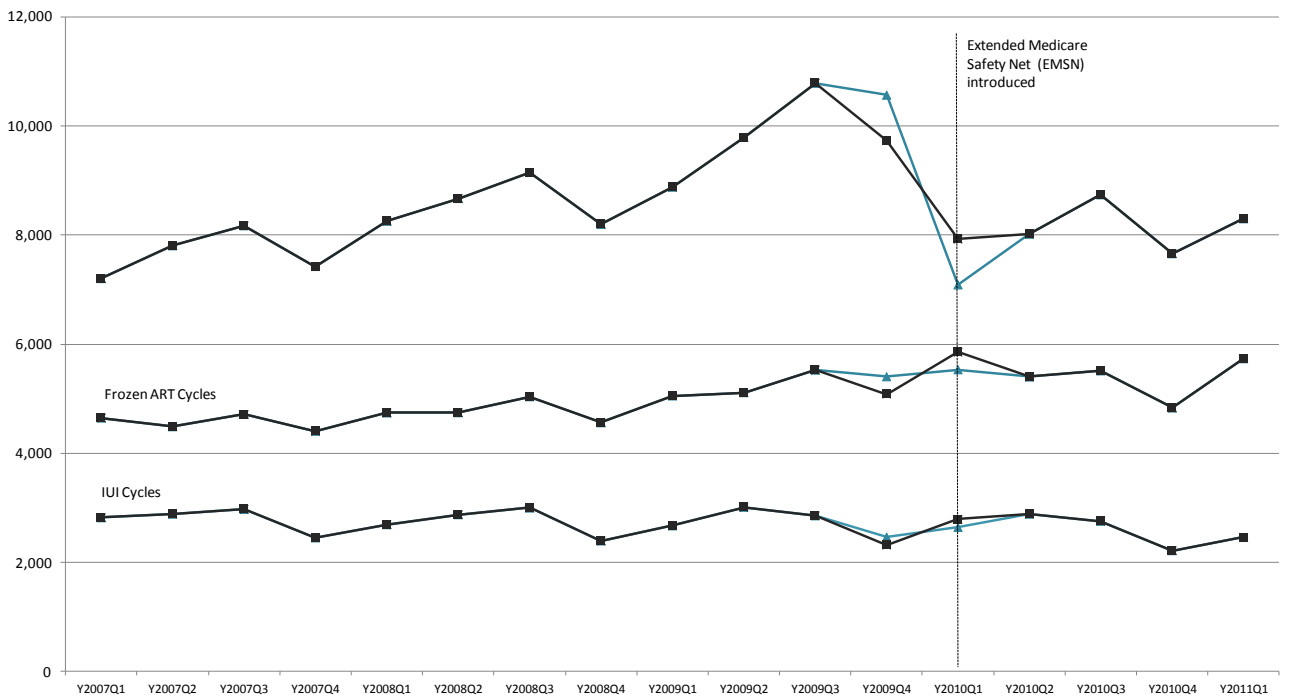

Supplement: MOESM2 [file 9529662]
